# Supplementary material for: Detection of Antimicrobial Residues in Poultry Litter: Monitoring a Risk through a Selective and Sensitive HPLC–MS/MS Method
Source: MDPI journal article supplement (doi:10.3390/ani11051399), 2021-05-14
Supplement: s1 [file s1]

Supplementary Materials

# Detection of antimicrobial residues in poultry litter: monitoring a risk through a selective and sensitive HPLC-MS/MS method

Karina Yévenes, Ekaterina Pokrant, Lina Trincado, Lisette Lapierre, Nicolás Galarce, Betty San Martín, Aldo Maddaleno, Héctor Hidalgo and Javiera Cornejo

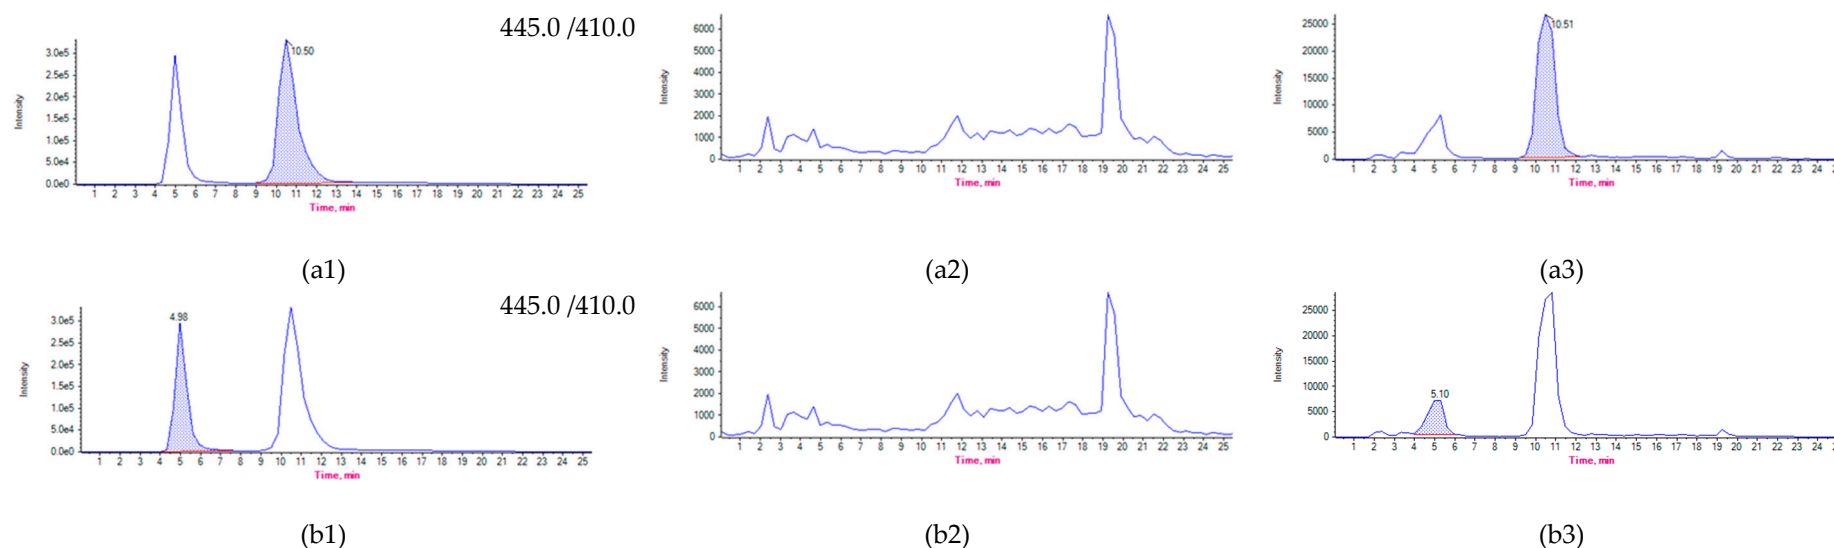

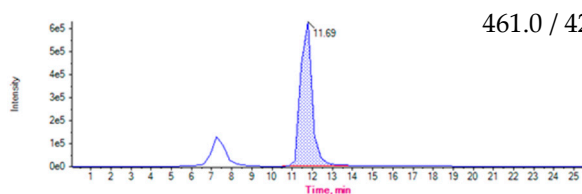

461.0 / 426.0

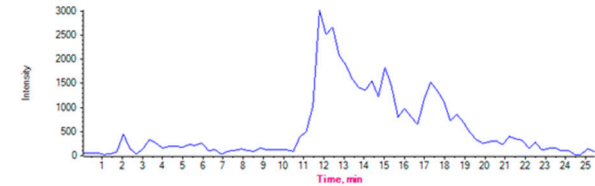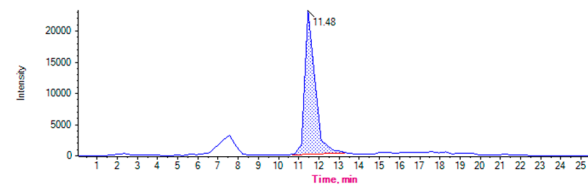

(c1)

(c2)

(c3)

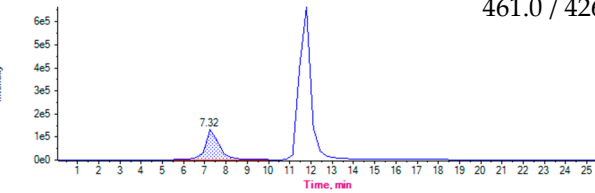

461.0 / 426.0

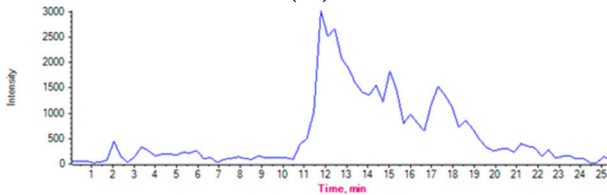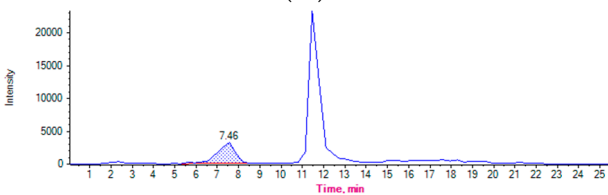

(d1)

(d2)

(d3)

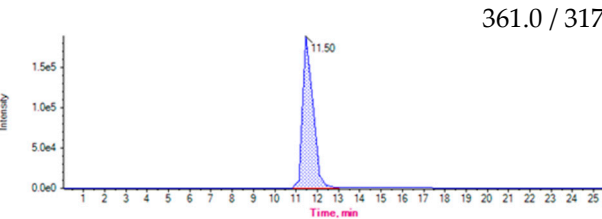

361.0 / 317.0

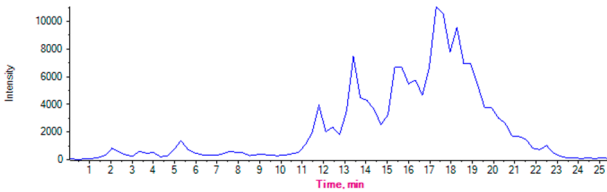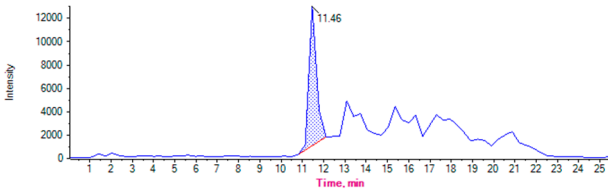

(e1)

(e2)

(e3)

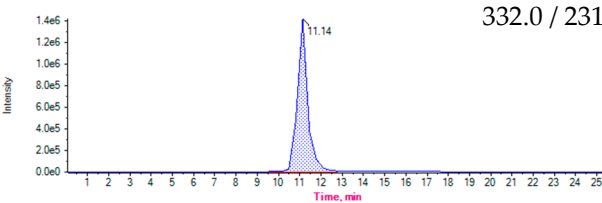

332.0 / 231.0

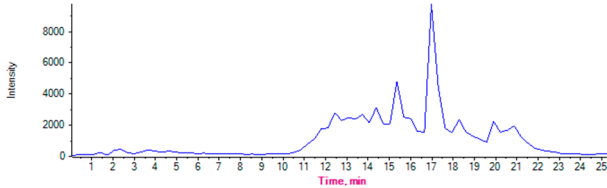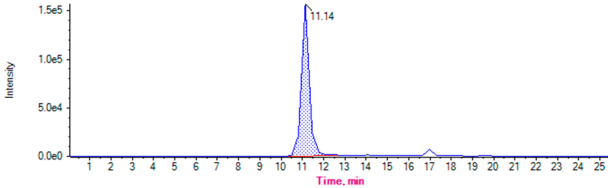

(f1)

(f2)

(f3)

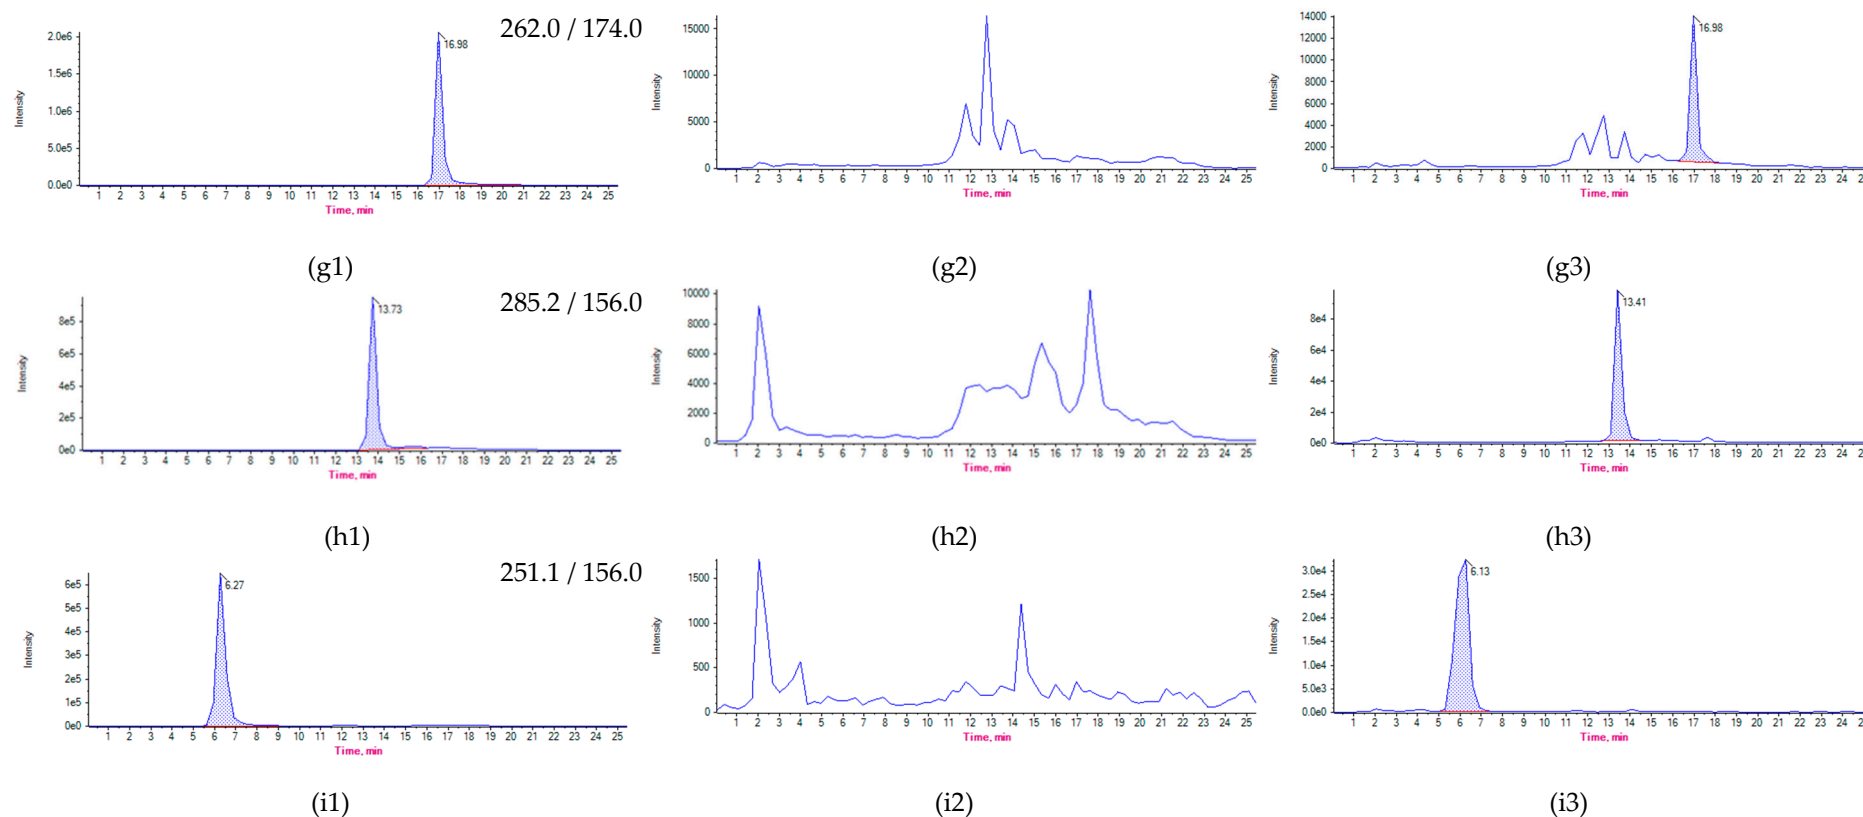

**Figure S1.** Representative chromatograms from (1) a pure standard solution injection ( $50 \text{ ng mL}^{-1}$ ), (2) a blank poultry litter sample and (3) poultry litter sample spiked to  $25 \text{ ug k}^{-1}$  of (a) tetracycline, (b) 4-epimer-tetracycline, (c) Oxitetracycline, (d) 4-epimer-oxitetracycline, (e) Enrofloxacin, (f) Ciprofloxacin, (g) Flumequine, (h) Sulfachloropyridazine, (i) Sulfadiazine.

**Table S1.** Scans per peak.

| <b>Analytes</b>                            | <b>Time (msec)</b> |
|--------------------------------------------|--------------------|
| Tetracycline / 4-epimer-Tetracycline       | 100.0              |
| Oxytetracycline / 4-epimer-Oxytetracycline | 100.0              |
| Enrofloxacin                               | 280.0              |
| Ciprofloxacin                              | 280.0              |
| Flumequine                                 | 280.0              |
| Sulfachloropyridazine                      | 280.0              |
| Sulfadiazine                               | 200.0              |
| Sulfamethazine-phenyl-13C6                 | 280.0              |
| Enrofloxacin-D5                            | 280.0              |
| Tetracycline-D6                            | 250.0              |

**Table S2.** Mass of precursor and fragment ions, and specific mass spectrometry conditions.

| Analytes                                            | Precursor Ion (m/z) | Fragment Ions (m/z) | DP <sup>3</sup> (V) | EP <sup>4</sup> (V) | CE <sup>5</sup> (V) | CXP <sup>6</sup> (V) |
|-----------------------------------------------------|---------------------|---------------------|---------------------|---------------------|---------------------|----------------------|
| Tetracycline / 4-epimer-Tetracycline                | 445.0               | 410.0 <sup>1</sup>  | 77.0                | 10.0                | 28.0                | 24.0                 |
|                                                     |                     | 392.0               | 69.0                | 10.0<br>0           | 38.0                | 23.0                 |
| Oxytetracycline / 4-epimer-Oxytetracycline          | 461.0               | 426.0 <sup>1</sup>  | 72.0                | 10.0                | 28.0                | 25.0                 |
|                                                     |                     | 381.0               | 73.0                | 10.0                | 36.0                | 22.0                 |
| Enrofloxacin                                        | 361.0               | 343.0               | 50.0                | 13.0                | 23.0                | 8.0                  |
|                                                     |                     | 317.0 <sup>1</sup>  | 50.0                | 13.0                | 28.0                | 20.0                 |
| Ciprofloxacin                                       | 332.0               | 231.0 <sup>1</sup>  | 56.0                | 4.5                 | 47.0                | 4.0                  |
|                                                     |                     | 314.0               | 56.0                | 4.5                 | 28.0                | 4.0                  |
| Flumequine                                          | 262.0               | 244.0               | 20.0                | 5.0                 | 10.0                | 13.0                 |
|                                                     |                     | 174.0 <sup>1</sup>  | 20.0                | 5.0                 | 50.0                | 7.0                  |
| Sulfachloropyridazine                               | 285.2               | 156.0 <sup>1</sup>  | 61.0                | 10.0                | 21.0                | 12.0                 |
|                                                     |                     | 108.1               | 61.0                | 10.0                | 31.0                | 8.0                  |
| Sulfadiazine                                        | 251.1               | 156.0 <sup>1</sup>  | 46.0                | 4.0                 | 19.0                | 4.0                  |
|                                                     |                     | 108.0               |                     |                     |                     |                      |
|                                                     |                     | 108.0               | 46.0                | 4.0                 | 31.0                | 4.0                  |
| Sulfamethazine-phenyl- <sup>13</sup> C <sup>6</sup> | 285.0               | 124.1               | 71.0                | 10.0                | 31.0                | 12.0                 |
| Enrofloxacin-D5 <sup>2</sup>                        | 365.0               | 321.0               | 50.0                | 7.0                 | 23.0                | 8.0                  |
| Tetracycline-D6 <sup>2</sup>                        | 451.0               | 160.0               | 34.0                | 10.0                | 25.0                | 30.0                 |

<sup>1</sup>Quantifier ion; <sup>2</sup>Internal Standard; <sup>3</sup>Declustering potential, <sup>4</sup>Entrance potential, <sup>5</sup>Collision energy, <sup>6</sup>Collision cell exit potential.

**Table S3.** Instrumental Limit of detection and Limit of quantification.

| Analyte                 | ILOD <sup>1</sup><br>( $\mu\text{g kg}^{-1}$ ) | ILOQ <sup>2</sup><br>( $\mu\text{g kg}^{-1}$ ) |
|-------------------------|------------------------------------------------|------------------------------------------------|
| Enrofloxacin            | 2.0                                            | 6.7                                            |
| Ciprofloxacin           | 3.1                                            | 10.4                                           |
| Flumequine              | 2.9                                            | 9.7                                            |
| Sulfachloropyridazine   | 3.0                                            | 10.1                                           |
| Sulfadiazine            | 2.8                                            | 9.5                                            |
| Tetracycline            | 3.4                                            | 11.4                                           |
| 4-epi-Tetracycline      | 2.9                                            | 9.7                                            |
| Oxytetracycline         | 2.7                                            | 8.9                                            |
| 4-epi-Oxytetracycline   | 2.3                                            | 7.8                                            |
| Chlortetracycline       | 3.3                                            | 11.1                                           |
| 4-epi-Chlortetracycline | 2.9                                            | 9.6                                            |

<sup>1</sup>Instrumental Limit of detection; <sup>2</sup>Instrumental Limit of quantification.
